# Supplementary material
Source: Springer Nature journal article supplement (https://www.springermedizin.de/resource/supplementary/13550_2013_136_MOESM4_ESM.pdf/9687664)

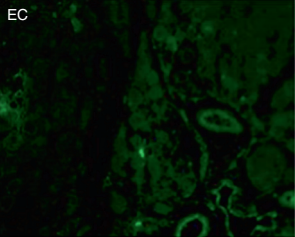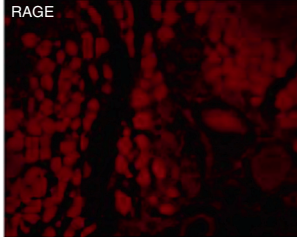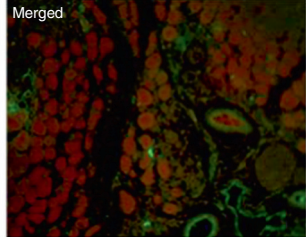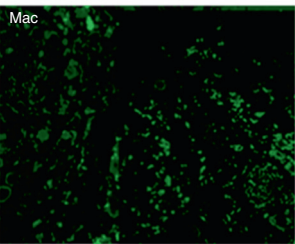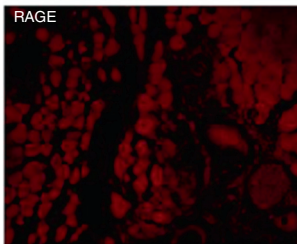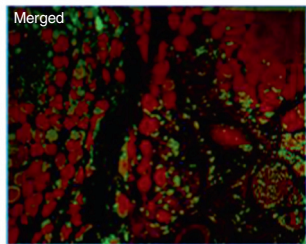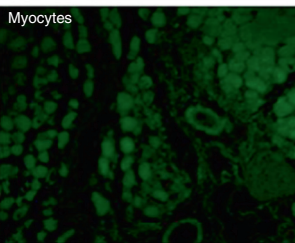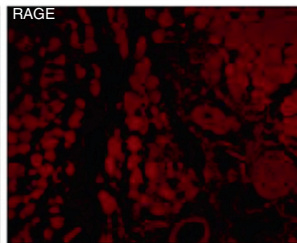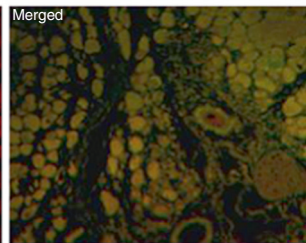

Supplement: MOESM4 [file 9687664]
